# Supplementary material
Source: publisher figshare collection journal article supplement (https://asha.figshare.com/articles/dataset/_/14575533)
Supplement: Supplementary file 1 [file 1]

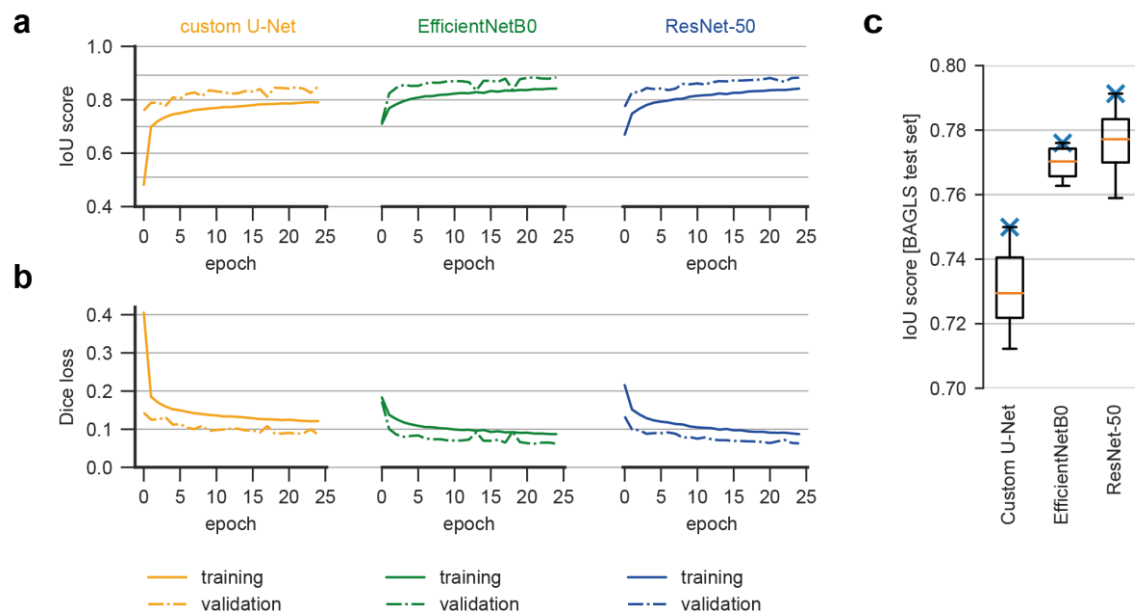

**Supplemental Figure S1. Neural network training metrics.** **a)** Intersection over Union (IoU) plots across training epochs for custom U-Net (orange), EfficientNetB0 (green) and ResNet-50 (blue) for training (solid line) and validation (dashed line) dataset. **b)** Dice loss plots across training epochs for custom U-Net (orange), EfficientNetB0 (green) and ResNet-50 (blue) for training (solid line) and validation (dashed line) dataset. **c)** K-fold cross-validation of deep neural networks using different training/validation splits ( $k = 6$ ). Blue crosses indicate the neural networks that are used in GAT.

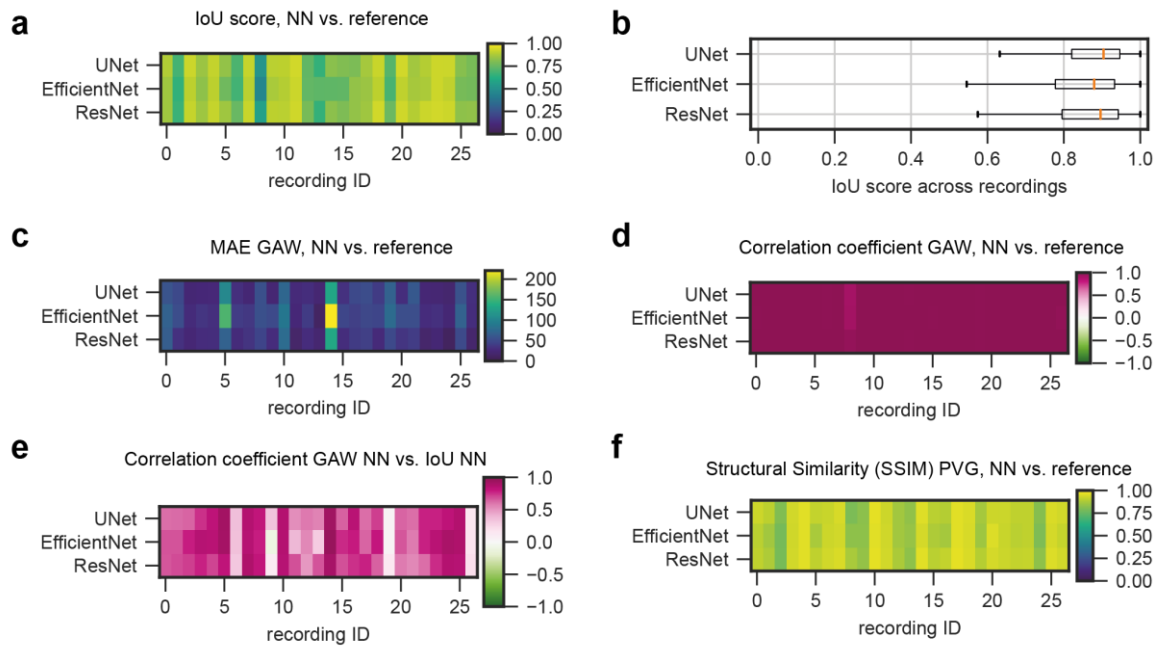

**Supplemental Figure S2. Neural network evaluation.** **a)** Average IoU score across neural networks compared to reference (semi-automatic segmentation). **b)** Distribution of IoU-Scores, computed on previously unseen data. **c)** Mean absolute error (MAE) of the neural network glottal area waveforms (GAWs) compared to the reference GAW. **d)** Correlation coefficient between the neural network GAWs and the reference GAW. **e)** Correlation coefficient between neural network GAW and IoU score. **f)** Structural similarity (SSIM) between the neural network phonovibrogram (PVG) and the reference PVG. High values indicate high similarity.

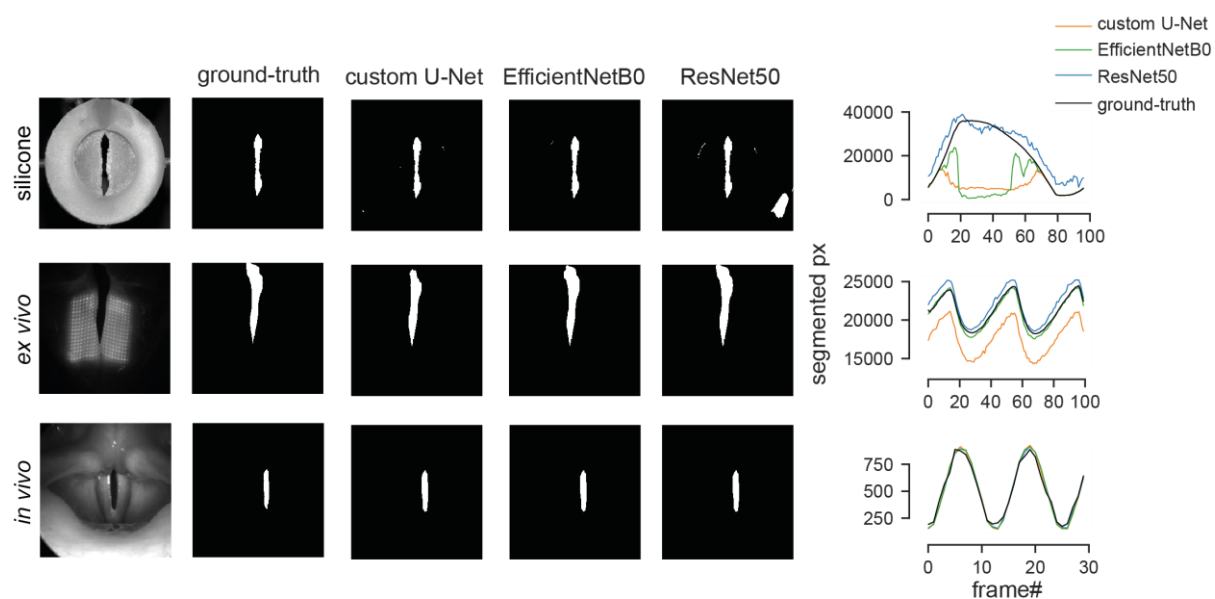

**Supplemental Figure S3. Example segmentations using different backbones from various source data.** From top to bottom: silicone vocal folds, *ex vivo* recordings, *in vivo* recordings.

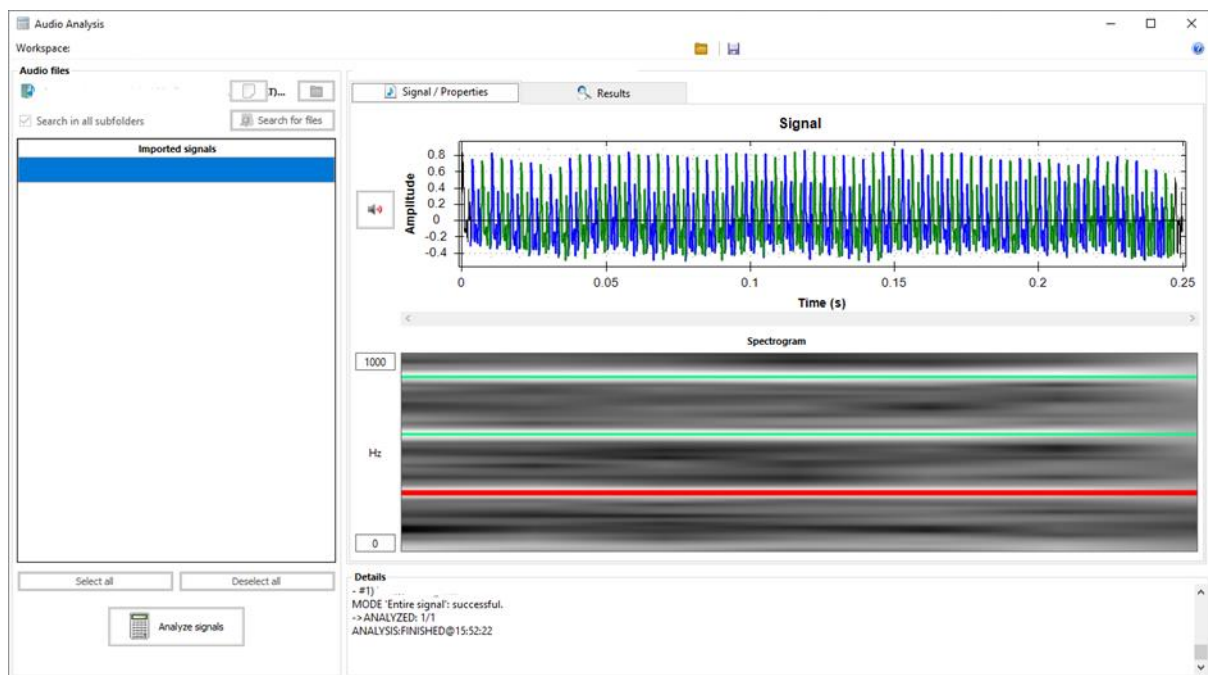

**Supplemental Figure S4: Audio analysis platform.** We provide next to the raw signal a spectrogram and a comprehensive parameter analysis.

**Supplementary Movie 1:** Endoscopic footage with semi-automatic and fully-automatic segmentation methods, multiple examples.

**Supplementary Data: GAT Manual**
